# Supplementary material for: Pathogen-associated molecular patterns alter molecular clock gene expression in mouse splenocytes
Source: PLoS One. 2017 Dec 18;12(12):e0189949. doi: 10.1371/journal.pone.0189949 (PMC5734770; doi:10.1371/journal.pone.0189949)
Supplement: S1 File — (XLSX) [file pone.0189949.s003.xlsx]

## Sheet: Figure 1
control	bmal 1	actin	rel. exp.		control	per2	actin	rel. exp.		control	dbp	actin	rel. exp.			control	rev	actin	rel. exp.
ZT1-1	0.321411	0.25447	1.26306		ZT1-1	0.184546	0.271006	0.680967		ZT1-1	0.781099	0.271006	2.88222			ZT1-1	0.290745	0.25447	1.14255
ZT1-2	1.26651	0.859654	1.47328		ZT1-2	0.877595	0.982946	0.892822		ZT1-2	2.26972	0.982946	2.3091			ZT1-2	0.514438	0.859654	0.598424
ZT1-3	0.40378	0.32265	1.25145		ZT1-3	0.249141	0.315384	0.789962		ZT1-3	0.433707	0.315384	1.37517			ZT1-3	0.259601	0.32265	0.804589
ZT1-4	0.09649	0.0365378	2.64082		ZT1-4	0.0137338	0.0418447	0.328209		ZT1-4	0.134231	0.0418447	3.20784			ZT1-4	0.0345446	0.0365378	0.945446
ZT1-5	0.517827	0.363593	1.42419		ZT1-5	0.246444	0.464736	0.530289		ZT1-5	1.2097	0.464736	2.60298			ZT1-5	0.422566	0.363593	1.1622
ZT13-1	0.755828	0.697273	1.08398		ZT13-1	0.675484	0.804962	0.83915		ZT13-1	3.47032	0.804962	4.31117			ZT13-1	3.17	0.697273	4.54629
ZT13-2	0.782816	0.852145	0.918641		ZT13-2	0.928167	0.977916	0.949128		ZT13-2	4.9333	0.977916	5.04471			ZT13-2	3.33128	0.852145	3.90928
ZT13-3	0.621801	0.515528	1.20614		ZT13-3	0.644485	0.638582	1.00924		ZT13-3	3.05707	0.638582	4.78729			ZT13-3	2.84466	0.515528	5.51794
ZT13-4	0.983766	0.829442	1.18606		ZT13-4	0.891007	0.836823	1.06475		ZT13-4	4.60502	0.836823	5.50298			ZT13-4	2.55964	0.829442	3.08598
ZT13-5	0.431004	0.341929	1.26051		ZT13-5	0.279485	0.395451	0.706749		ZT13-5	1.32433	0.395451	3.34891			ZT13-5	1.03326	0.341929	3.02186
pam3csk	bmal 1	actin	rel. exp.		pam3csk	per2	actin	rel. exp.		pam3csk	dbp	actin	rel. exp.			pam3csk	rev	actin	rel. exp.
ZT1-1	1.01062	0.913596	1.1062		ZT1-1	1.47794	0.913596	1.61772		ZT1-1	0.841761	0.913596	0.921371			ZT1-1	0.735937	0.913596	0.805538
ZT1-2	1.02744	0.993013	1.03467		ZT1-2	1.23336	0.993013	1.24204		ZT1-2	0.457375	0.993013	0.460594			ZT1-2	0.377236	0.993013	0.379891
ZT1-3	0.764794	0.741054	1.03204		ZT1-3	1.0406	0.741054	1.40422		ZT1-3	0.476094	0.741054	0.642455			ZT1-3	0.499418	0.741054	0.673928
ZT1-4	0.880238	1.1057	0.796088		ZT1-4	1.4352	1.1057	1.298		ZT1-4	1.27751	1.1057	1.15538			ZT1-4	0.698917	1.1057	0.632101
ZT1-5	0.593355	0.951709	0.623462		ZT1-5	1.01533	0.951709	1.06685		ZT1-5	0.608501	0.951709	0.639378			ZT1-5	0.578428	0.951709	0.607778
ZT13-1	0.656698	0.781949	0.839822		ZT13-1	1.09967	0.781949	1.40631		ZT13-1	1.15566	0.781949	1.47793
ZT13-2	0.994398	1.23012	0.808373		ZT13-2	1.73196	1.23012	1.40796		ZT13-2	1.66939	1.23012	1.35709			ZT13-1	3.86144	0.781949	4.93822
ZT13-3	0.444274	0.403113	1.10211		ZT13-3	0.721545	0.403113	1.78993		ZT13-3	0.57783	0.403113	1.43342			ZT13-2	5.18706	1.23012	4.2167
ZT13-4	1.13547	1.51156	0.751192		ZT13-4	2.06154	1.51156	1.36384		ZT13-4	2.0359	1.51156	1.34689			ZT13-3	1.7275	0.403113	4.28541
ZT13-5	0.992104	1.34351	0.738443		ZT13-5	1.47774	1.34351	1.09991		ZT13-5	1.2506	1.34351	0.930844			ZT13-4	3.96887	1.51156	2.62567
																ZT13-5	3.57667	1.34351	2.66218
HKLM	bmal 1	actin	rel. exp.		HKLM	per2	actin	rel. exp.		HKLM	dbp	actin	rel. exp.			HKLM	rev	actin	rel. exp.
ZT1-1	0.744512	0.806291	0.923378		ZT1-1	0.657292	0.806291	0.815205		ZT1-1	1.02235	0.806291	1.26797			ZT1-1	0.559505	0.806291	0.693924
ZT1-2	0.788342	0.629248	1.25283		ZT1-2	0.562876	0.629248	0.894522		ZT1-2	1.38909	0.629248	2.20754			ZT1-2	0.350827	0.629248	0.557534
ZT1-3	0.679535	0.56268	1.20768		ZT1-3	0.425318	0.56268	0.755879		ZT1-3	0.742264	0.56268	1.31916			ZT1-3	0.401271	0.56268	0.713142
ZT1-4	0.799236	0.644217	1.24063		ZT1-4	0.567441	0.644217	0.880823		ZT1-4	0.936144	0.644217	1.45315			ZT1-4	0.449378	0.644217	0.697556
ZT1-5	0.692207	0.651058	1.0632		ZT1-5	0.322141	0.651058	0.494796		ZT1-5	0.5486	0.651058	0.842628			ZT1-5	0.344088	0.651058	0.528505
ZT13-1	0.781687	0.876695	0.89163		ZT13-1	0.796723	0.876695	0.90878		ZT13-1	2.07607	0.876695	2.36807			ZT13-1	3.86197	0.876695	4.40515
ZT13-2	0.781219	0.846321	0.923077		ZT13-2	0.833844	0.846321	0.985257		ZT13-2	1.9567	0.846321	2.312			ZT13-2	2.75914	0.846321	3.26015
ZT13-3	0.467519	0.473774	0.986797		ZT13-3	0.516595	0.473774	1.09038		ZT13-3	1.03967	0.473774	2.19443			ZT13-3	2.1288	0.473774	4.49328
ZT13-4	1.06221	1.17239	0.906024		ZT13-4	1.00335	1.17239	0.855818		ZT13-4	3.24267	1.17239	2.76586			ZT13-4	3.12618	1.17239	2.66651
ZT13-5	0.613686	0.697879	0.87936		ZT13-5	0.458304	0.697879	0.65671		ZT13-5	1.91489	0.697879	2.74387			ZT13-5	1.78952	0.697879	2.56423
poly(I:C)	bmal 1	actin	rel. exp.		poly(I:C)	per2	actin	rel. exp.		poly(I:C)	dbp	actin	rel. exp.			poly(I:C)	rev	actin	rel. exp.
ZT1-1	0.785995	0.798228	0.984675		ZT1-1	0.548369	0.798228	0.686982		ZT1-1	0.317576	0.798228	0.397851			ZT1-1	0.263265	0.798228	0.329812
ZT1-2	0.574064	0.686055	0.836761		ZT1-2	0.504435	0.686055	0.735268		ZT1-2	0.302119	0.686055	0.440371			ZT1-2	0.183069	0.686055	0.266843
ZT1-3	0.451604	0.588439	0.767461		ZT1-3	0.393747	0.588439	0.669138		ZT1-3	0.19842	0.588439	0.337197			ZT1-3	0.119526	0.588439	0.203124
ZT1-4	0.743727	0.900353	0.826039		ZT1-4	0.557449	0.900353	0.619145		ZT1-4	0.390117	0.900353	0.433294			ZT1-4	0.244433	0.900353	0.271486
ZT1-5	0.774281	0.971362	0.797109		ZT1-5	0.574114	0.971362	0.59104		ZT1-5	0.543626	0.971362	0.559654			ZT1-5	0.23274	0.971362	0.239601
										ZT13-1	0.371394	0.669583	0.554664			ZT13-1	1.34655	0.669583	2.01103
ZT13-1	0.581149	0.669583	0.867927		ZT13-1	0.361352	0.669583	0.539667		ZT13-2	0.796632	0.958055	0.83151			ZT13-2	1.38234	0.958055	1.44286
ZT13-2	0.754031	0.958055	0.787043		ZT13-2	0.717835	0.958055	0.749263		ZT13-3	0.662691	0.480238	1.37992			ZT13-3	0.54935	0.480238	1.14391
ZT13-3	0.617266	0.480238	1.28533		ZT13-3	0.475841	0.480238	0.990844		ZT13-4	0.831284	0.760183	1.09353			ZT13-4	0.663862	0.760183	0.873292
ZT13-4	0.74888	0.760183	0.98513		ZT13-4	0.428461	0.760183	0.563629		ZT13-5	0.394324	0.789116	0.499704			ZT13-5	0.509546	0.789116	0.645717
ZT13-5	0.726315	0.789116	0.920416		ZT13-5	0.398078	0.789116	0.504461
FLA	bmal 1	actin	rel. exp.		FLA	per2	actin	rel. exp.		FLA	dbp	actin	rel. exp.			FLA	rev	actin	rel. exp.
ZT1-1	0.693648	0.655947	1.05748		ZT1-1	0.416934	0.655947	0.635622		ZT1-1	0.559896	0.655947	0.853569			ZT1-1	0.35051	0.655947	0.534358
ZT1-2	0.821141	0.643794	1.27547		ZT1-2	0.495276	0.643794	0.769309		ZT1-2	0.725155	0.643794	1.12638			ZT1-2	0.328897	0.643794	0.510873
ZT1-3	1.00747	0.760807	1.32421		ZT1-3	0.757203	0.760807	0.995263		ZT1-3	0.619984	0.760807	0.814903			ZT1-3	0.600402	0.760807	0.789164
ZT1-4	0.793197	0.618604	1.28224		ZT1-4	0.468177	0.618604	0.756828		ZT1-4	0.5491	0.618604	0.887644			ZT1-4	0.435929	0.618604	0.704698
ZT1-5	0.923183	0.808359	1.14205		ZT1-5	0.358413	0.808359	0.443383		ZT1-5	0.609568	0.808359	0.754081			ZT1-5	0.502581	0.808359	0.62173
ZT13-1	0.338433	0.241864	1.39927		ZT13-1	0.292819	0.241864	1.21068		ZT13-1	0.31716	0.241864	1.31132			ZT13-1	1.1604	0.241864	4.79774
ZT13-2	0.81127	0.861153	0.942074		ZT13-2	0.681615	0.861153	0.791515		ZT13-2	0.665282	0.861153	0.772548			ZT13-2	2.73825	0.861153	3.17975
ZT13-3	0.785412	0.819992	0.957828		ZT13-3	0.649966	0.819992	0.792649		ZT13-3	0.962571	0.819992	1.17388			ZT13-3	2.32361	0.819992	2.8337
ZT13-4	0.930954	1.13193	0.82245		ZT13-4	0.871675	1.13193	0.77008		ZT13-4	0.872452	1.13193	0.770767			ZT13-4	2.9083	1.13193	2.56933
ZT13-5	1.04974	1.04626	1.00333		ZT13-5	0.628528	1.04626	0.600738		ZT13-5	1.03231	1.04626	0.986673			ZT13-5	2.34625	1.04626	2.24252
ssRNA	bmal 1	actin	rel. exp.		ssRNA	per2	actin	rel. exp.		ssRNA	dbp	actin	rel. exp.			ssRNA	rev	actin	rel. exp.
ZT1-1	0.974719	0.716811	1.3598		ZT1-1	0.449369	0.716811	0.6269		ZT1-1	2.0045	0.716811	2.79642			ZT1-1	0.630265	0.716811	0.879262
ZT1-2	0.781092	0.664667	1.17516		ZT1-2	0.432246	0.664667	0.65032		ZT1-2	1.86397	0.664667	2.80436			ZT1-2	0.481129	0.664667	0.723865
ZT1-3	0.670707	0.561833	1.19378		ZT1-3	0.429105	0.561833	0.763759		ZT1-3	1.03878	0.561833	1.84891			ZT1-3	0.509492	0.561833	0.906838
ZT1-4	0.606304	0.470103	1.28973		ZT1-4	0.372183	0.470103	0.791705		ZT1-4	1.30616	0.470103	2.77845			ZT1-4	0.344721	0.470103	0.733289
ZT1-5	0.717561	0.56769	1.264		ZT1-5	0.352424	0.56769	0.620804		ZT1-5	1.7853	0.56769	3.14485			ZT1-5	0.392596	0.56769	0.691567
					ZT13-1	0.421487	0.703786	0.598885		ZT13-1	4.20608	0.703786	5.97636			ZT13-1	2.12003	0.703786	3.01232
ZT13-1	0.831401	0.703786	1.18133		ZT13-2	0.680312	0.980421	0.693899		ZT13-2	8.11016	0.980421	8.27212			ZT13-2	2.80623	0.980421	2.86227
ZT13-2	1.09329	0.980421	1.11512		ZT13-3	0.501722	0.53362	0.940222		ZT13-3	4.10074	0.53362	7.68476			ZT13-3	1.6884	0.53362	3.16404
ZT13-3	0.752598	0.53362	1.41036		ZT13-4	0.435172	0.527859	0.824411		ZT13-4	3.95686	0.527859	7.49606			ZT13-4	0.00858127	0.00342808	2.50323
ZT13-4	1.63989	0.527859	3.10669													ZT13-5	1.16926	0.527859	2.2151
ODN	bmal 1	actin	rel. exp.		ODN	per2	actin	rel. exp.		ODN	dbp	actin	rel. exp.			ODN	rev	actin	rel. exp.
ZT1-1	0.68349	0.792701	0.862229		ZT1-1	2.19997	0.792701	2.77528		ZT1-1	0.653841	0.792701	0.824827			ZT1-1	0.530992	0.792701	0.669851
ZT1-2	0.623193	0.814268	0.765341		ZT1-2	2.70106	0.814268	3.31717		ZT1-2	0.709505	0.814268	0.871341			ZT1-2	0.368995	0.814268	0.453161
ZT1-3	0.511572	0.506936	1.00914		ZT1-3	1.5489	0.506936	3.05541		ZT1-3	0.272504	0.506936	0.53755			ZT1-3	0.308967	0.506936	0.609479
ZT1-4	0.382193	0.40492	0.943874		ZT1-4	1.10247	0.40492	2.72268		ZT1-4	0.204113	0.40492	0.504082			ZT1-4	0.329783	0.40492	0.81444
ZT1-5	0.585532	0.886599	0.660425		ZT1-5	2.24251	0.886599	2.52934		ZT1-5	0.439823	0.886599	0.496079			ZT1-5	0.620931	0.886599	0.700352
ZT13-1	0.304924	0.526453	0.579204		ZT13-1	1.10689	0.526453	2.10254		ZT13-1	0.571147	0.526453	1.0849			ZT13-1	2.3938	0.526453	4.54703
ZT13-2	0.777728	0.963294	0.807363		ZT13-2	2.37548	0.963294	2.466		ZT13-2	0.86479	0.963294	0.897742			ZT13-2	3.07906	0.963294	3.19639
ZT13-3	0.744987	0.913608	0.815434		ZT13-3	2.6781	0.913608	2.93135		ZT13-3	1.02059	0.913608	1.11709			ZT13-3	4.06085	0.913608	4.44485
ZT13-4	0.736978	1.06738	0.690458		ZT13-4	2.32744	1.06738	2.18053		ZT13-4	1.07696	1.06738	1.00898			ZT13-4	2.72587	1.06738	2.5538
ZT13-5	0.549375	0.727583	0.755068		ZT13-5	2.04287	0.727583	2.80775		ZT13-5	0.682426	0.727583	0.937935			ZT13-5	2.11845	0.727583	2.91163

## Sheet: Figure 2
		ZT1 - control					ZT13 - control				ZT1 - control					ZT13 - control
	bmal1	actin	rel. exp.			bmal1	actin	rel. exp.		rev	actin	rel. exp.			rev	actin	rel. exp.
	2.50465	1.94072	1.29058			2.61471	2.44676	1.06864		17.2818	1.94072	8.90485			7.13773	2.44676	2.91722
	3.93844	2.24983	1.75055			3.66471	2.31633	1.58212		30.7288	2.24983	13.6582			4.76179	2.31633	2.05575
	1.66467	1.10352	1.5085			3.28917	3.15015	1.04413		11.7811	1.10352	10.6759			9.75537	3.15015	3.0968
	2.2069	2.23754	0.986305			3.81621	3.4292	1.11286		18.157	2.23754	8.11473			8.96133	3.4292	2.61324
	4.60564	2.33711	1.97065			4.53109	3.77468	1.20039		26.6289	2.33711	11.3939			9.08095	3.77468	2.40576
		ZT1 - polyIC					ZT13 - polyIC				ZT1 - polyIC					ZT13 - polyIC
	bmal1	actin	rel. exp.			bmal1	actin	rel. exp.		rev	actin	rel. exp.			rev	actin	rel. exp.
	3.56945	6.05137	0.589858			1.46416	1.85863	0.787762		14.1917	6.05137	2.3452			3.25932	1.85863	1.75361
	5.852	5.10852	1.14554			2.06685	4.92053	0.420046		11.1042	5.10852	2.17366			1.46051	4.92053	0.29682
	1.66711	4.48642	0.371591			5.19564	9.62357	0.539886		12.8157	4.48642	2.85655			2.82318	9.62357	0.293361
	3.75466	7.39416	0.507787			7.28283	4.9636	1.46725		18.4207	7.39416	2.49125			2.79424	4.9636	0.562946
	2.48758	7.54545	0.329679							16.4303	7.54545	2.17751			17.3699	5.94697	2.9208
		ZT1 - control					ZT13 - control				ZT1 - control					ZT13 - control
	per2	actin	rel. exp.			per2	actin	rel. exp.		dbp	actin	rel. exp.			dbp	actin	rel. exp.
	2.94911	1.94072	1.5196			2.4035	2.44676	0.982321		68.3084	1.94072	35.1975			14.3336	2.44676	5.85821
	4.42109	2.24983	1.96508			2.04469	2.31633	0.882728		96.2697	2.24983	42.7897			9.44019	2.31633	4.0755
	2.65908	1.10352	2.40963			2.90903	3.15015	0.923457		54.4756	1.10352	49.3652			21.3345	3.15015	6.77255
	3.07262	2.23754	1.37321			3.41078	3.4292	0.99463		44.9696	2.23754	20.0978			12.748	3.4292	3.71748
	4.38253	2.33711	1.87519			3.77306	3.77468	0.999571		90.8313	2.33711	38.8647			11.4008	3.77468	3.02033
		ZT1 - polyIC					ZT13 - polyIC				ZT1 - polyIC					ZT13 - polyIC
	per2	actin	rel. exp.			per2	actin	rel. exp.		dbp	actin	rel. exp.			dbp	actin	rel. exp.
	3.37911	6.05137	0.558404			2.38119	1.85863	1.28115		13.6151	6.05137	2.24991			4.84551	1.85863	2.60703
	4.25995	5.10852	0.833891			2.24954	4.92053	0.457175		17.3113	5.10852	3.38872			10.328	4.92053	2.09896
	3.43471	4.48642	0.765581			3.53293	9.62357	0.367112		9.90068	4.48642	2.20681			11.8044	9.62357	1.22661
	5.91402	7.39416	0.799823			3.15132	4.9636	0.634887		13.9831	7.39416	1.8911			7.14494	4.9636	1.43947
	3.0154	7.54545	0.399631			5.19038	5.94697	0.872778		9.93571	7.54545	1.31678			15.8371	5.94697	2.66306

## Sheet: Figure S1
		rev	actin	rel. exp	% max
	Poly(I:C)	6.46058	1.89656	3.40648	17.7977
	Poly(I:C)	1.96454	0.62769	3.1298	16.3521
	Poly(I:C)	8.13488	0.425047	19.1388	99.9936
	Poly(I:C)	11.3707	0.657459	17.2949	90.3602
	Poly(I:C)	3.04224	0.72427	4.20042	21.9458
	Poly(I:C)	15.0703	1.47766	10.1988	53.285
	Cntrl	14.492	1.44202	10.0498	52.5067
	Cntrl	10.3653	1.41397	7.33061	38.2999
	Cntrl	10.3883	1.08213	9.59993	50.1564
	Cntrl	6.21744	1.22073	5.09321	26.6103
	Cntrl	0.884212	0.340868	2.594	13.5528
		per2	actin	rel. exp	% max
	Poly(I:C)	1.19394	1.89656	0.629527	76.7716
	Poly(I:C)	0.335659	0.62769	0.534753	65.2138
	Poly(I:C)	0.350478	0.425047	0.824562	100.556
	Poly(I:C)	0.410881	0.657459	0.624953	76.2138
	Poly(I:C)	0.480438	0.72427	0.663342	80.8953
	Poly(I:C)	0.981332	1.47766	0.664111	80.9892
	Cntrl	1.07799	1.44202	0.747554	91.1651
	Cntrl	0.764697	1.41397	0.540815	65.953
	Cntrl	0.834065	1.08213	0.770764	93.9956
	Cntrl	0.593768	1.22073	0.486403	59.3174
	Cntrl	0.271214	0.340868	0.795656	97.0312
		bmal	actin	rel. exp	% max
	Poly(I:C)	78.3157	2.87471	27.243	100.011
	Poly(I:C)	6.29615	0.761559	8.26745	30.3504
	Poly(I:C)	5.00102	0.539474	9.27019	34.0315
	Poly(I:C)	7.87526	0.816578	9.64422	35.4046
	Poly(I:C)	10.697	0.694724	15.3974	56.5251
	Poly(I:C)	19.1468	1.80693	10.5963	38.8999
	Cntrl	26.7296	2.01287	13.2793	48.7493
	Cntrl	28.1261	1.75737	16.0047	58.7543
	Cntrl	30.6897	1.39781	21.9555	80.6002
	Cntrl	15.0996	1.34543	11.2229	41.2001
	Cntrl	7.39731	0.274663	26.9323	98.8704
		dbp	actin	rel. exp	% max
	Poly(I:C)	204245	2.87471	71048.7	13.2423
	Poly(I:C)	7403.25	0.761559	9721.18	1.81187
	Poly(I:C)	27244.5	0.539474	50502.1	9.41275
	Poly(I:C)	189419	0.816578	231967	43.2348
	Poly(I:C)	14951.2	0.694724	21521.1	4.01118
	Poly(I:C)	370298	1.80693	204932	38.196
	Cntrl	1.07996e+06	2.01287	536529	100
	Cntrl	589093	1.75737	335213	62.4782
	Cntrl	53192.3	1.39781	38053.9	7.09262
	Cntrl	80074.5	1.34543	59516	11.0928
	Cntrl	3048.05	0.274663	11097.4	2.06837

## Sheet: Figure S2
		per2	B-actin	relative exp.			rev	b-actin	rel. exp.			tlr1	actin	rel exp
	3	0.222644	0.54575	0.407959		3	0.306432	0.54575	0.561488		3	0.528886	0.54575	0.9691
	3	0.115978	0.569517	0.203643		3	0.086148	0.569517	0.151265		3	0.188362	0.569517	0.33074
	3	0.509307	1.23118	0.413674		3	0.554874	1.23118	0.450686		3	0.90209	1.23118	0.732705
	3	0.263931	0.456639	0.577987		3	0.309048	0.456639	0.676789		3	0.39124	0.456639	0.856782
	3	0.0193336	0.0969483	0.199422		3	0.0182024	0.0969483	0.187754		3	0.0490942	0.0969483	0.506396
	7	0.0244846	0.084391	0.290133		7	0.0148305	0.084391	0.175736		7	0.0572448	0.084391	0.678329
	7	0.0445052	0.154341	0.288357		7	0.0498883	0.154341	0.323235		7	0.109032	0.154341	0.70644
	7	0.151753	0.454036	0.334231		7	0.207886	0.454036	0.457863		7	0.342622	0.454036	0.754614
	7	0.0246185	0.0664163	0.370669		7	0.0642285	0.0664163	0.967059		7	0.0315959	0.0664163	0.475725
	7	0.0257188	0.156831	0.16399		7	0.0261407	0.156831	0.16668		7	0.0672198	0.156831	0.428612
	11	0.00148883	0.0105876	0.14062		11	0.00683568	0.0105876	0.645631		11	0.00320901	0.0105876	0.303091
	11	0.120755	0.334703	0.360782		11	0.131108	0.334703	0.391715		11	0.243307	0.334703	0.726934
	11	0.124213	0.343312	0.361806		11	0.261931	0.343312	0.762951		11	0.21855	0.343312	0.636591
	11	0.0137802	0.0670997	0.205369		11	0.011034	0.0670997	0.164442		11	0.0251823	0.0670997	0.375297
	11	0.0440818	0.136363	0.323269		11	0.0301804	0.136363	0.221324		11	0.0575503	0.136363	0.422038
	15	0.489848	0.440931	1.11094		15	0.778886	0.440931	1.76646		15	0.546307	0.440931	1.23898
	15	0.0258498	0.128179	0.20167		15	0.0387061	0.128179	0.301969		15	0.064399	0.128179	0.502415
	15	0.403541	0.51255	0.787322		15	0.513197	0.51255	1.00126		15	0.393929	0.51255	0.768567
	15	0.16607	0.234191	0.709123		15	0.276078	0.234191	1.17886		15	0.24399	0.234191	1.04184
	15	0.148491	0.292431	0.507779		15	0.46971	0.292431	1.60622		15	0.230962	0.292431	0.789801
	19	0.591585	0.741897	0.797395		19	0.646739	0.741897	0.871737		19	0.667882	0.741897	0.900234
	19	0.308638	0.364115	0.847637		19	0.242722	0.364115	0.666609		19	0.336868	0.364115	0.92517
	19	0.522505	0.626608	0.833863		19	0.551575	0.626608	0.880256		19	0.597842	0.626608	0.954093
	19	0.0034014	0.0161199	0.211007		19	0.0104235	0.0161199	0.646626		19	0.0143179	0.0161199	0.888216
	19	0.0279713	0.0701868	0.398526		19	0.0167974	0.0701868	0.239324		19	0.0494747	0.0701868	0.7049
	23	0.0828452	0.252189	0.328505		23	0.0535578	0.252189	0.212372		23	0.0654817	0.252189	0.259654
	23	1129.65				23					23
	23	0.18624	0.494035	0.376978		23	0.131881	0.494035	0.266947		23	0.198654	0.494035	0.402104
	23	0.328675	0.576475	0.570146		23	0.369379	0.576475	0.640755		23	0.348161	0.576475	0.603948
	23	1.92986	2.61416	0.738236		23	1.36193	2.61416	0.52098		23	1.48247	2.61416	0.567094
		tlr2	actin	rel exp			tlr3	actin	rel exp			tlr5	actin	rel exp
	3	0.301941	0.54575	0.553259		3	0.692794	0.54575	1.26944		3	0.369705	0.54575	0.677426
	3	0.0780558	0.569517	0.137056		3	0.185407	0.569517	0.325552		3	0.333849	0.569517	0.586197
	3	0.698358	1.23118	0.567227		3	0.765768	1.23118	0.62198		3	0.833153	1.23118	0.676712
	3	0.350386	0.456639	0.767315		3	0.435917	0.456639	0.954621		3	0.419249	0.456639	0.91812
	3	0.0291792	0.0969483	0.300976		3	0.0921774	0.0969483	0.95079		3	0.0810961	0.0969483	0.836488
	7	0.0203796	0.084391	0.24149		7	0.0810932	0.084391	0.960923		7	0.0675416	0.084391	0.800341
	7	0.0625261	0.154341	0.405118		7	0.184568	0.154341	1.19585		7	0.109621	0.154341	0.710252
	7	0.295618	0.454036	0.65109		7	0.416998	0.454036	0.918426		7	0.358028	0.454036	0.788546
	7	0.044289	0.0664163	0.666839		7	0.101904	0.0664163	1.53432		7	0.0734012	0.0664163	1.10517
	7	0.0232655	0.156831	0.148347		7	0.0771882	0.156831	0.492173		7	0.0963821	0.156831	0.614558
	11	0.00301199	0.0105876	0.284483		11	0.00820118	0.0105876	0.774603		11	0.0181951	0.0105876	1.71853
	11	0.189566	0.334703	0.56637		11	0.314629	0.334703	0.940024		11	0.281247	0.334703	0.840289
	11	0.212891	0.343312	0.620109		11	0.411553	0.343312	1.19877		11	0.280635	0.343312	0.817432
	11	0.0129374	0.0670997	0.192809		11	0.0436216	0.0670997	0.650101		11	0.0449163	0.0670997	0.669396
	11	0.0333006	0.136363	0.244206		11	0.0770326	0.136363	0.564909		11	0.0733074	0.136363	0.537591
	15	0.517927	0.440931	1.17462		15	0.478023	0.440931	1.08412		15	0.486359	0.440931	1.10303
	15	0.0343309	0.128179	0.267835		15	0.120138	0.128179	0.937266		15	0.0997151	0.128179	0.777937
	15	0.437532	0.51255	0.853638		15	0.547363	0.51255	1.06792		15	0.350229	0.51255	0.683308
	15	0.206053	0.234191	0.879851		15	0.326572	0.234191	1.39447		15	0.164667	0.234191	0.70313
	15	0.243939	0.292431	0.834174		15	0.328425	0.292431	1.12308		15	0.23092	0.292431	0.789654
	19	0.713397	0.741897	0.961584		19	0.748915	0.741897	1.00946		19	0.786486	0.741897	1.0601
	19	0.30403	0.364115	0.834983		19	0.41729	0.364115	1.14604		19	0.300668	0.364115	0.825751
	19	0.730442	0.626608	1.16571		19	0.563334	0.626608	0.899023		19	0.539951	0.626608	0.861705
	19	0.00917043	0.0161199	0.56889		19	0.0465988	0.0161199	2.89077		19	0.0229417	0.0161199	1.42319
	19	0.0262729	0.0701868	0.374329		19	0.0806453	0.0701868	1.14901		19	0.0483957	0.0701868	0.689526
	23	0.0651923	0.252189	0.258506		23	0.136057	0.252189	0.539503		23	0.134761	0.252189	0.534364
	23					23					23
	23	0.200393	0.494035	0.405625		23	0.274589	0.494035	0.555808		23	0.163029	0.494035	0.329994
	23	0.377035	0.576475	0.654035		23	0.455208	0.576475	0.78964		23	0.224708	0.576475	0.389797
	23	1.88827	2.61416	0.722325		23	1.35193	2.61416	0.517158		23	1.52398	2.61416	0.58297
